# Supplementary material
Source: PubMed Central journal article supplement (PMC3696792)
Supplement: 1301605110_pnas.201301605SI.pdf [file 1301605110_pnas.201301605SI.pdf]

# Supporting Information

Snyder et al. 10.1073/pnas.1301605110

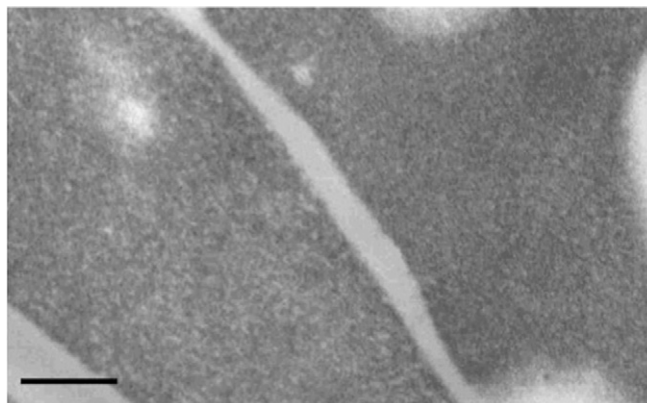

**Fig. S1.** Immunogold localization of Vps4 in *Sulfolobus solfataricus* PH1-16 cells treated with 0.4% (vol/vol) galactose to repress expression of C92. (Scale bar: 100 nm.)

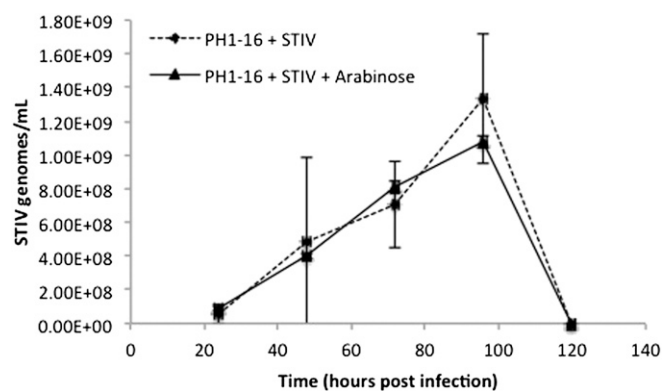

**Fig. S2.** STIV infection of *S. solfataricus* PH1-16 is not affected by the presence of arabinose. Quantitative PCR measurements of *Sulfolobus* turreted icosahedral virus (STIV) B345 gene abundance during the course of STIV infections done in the presence (dotted line) or absence (solid line) of arabinose.
